# Supplementary material
Source: MDPI journal article supplement (https://www.mdpi.com/2072-4292/14/24/6296)
Supplement: s1 [file s1]

## Number of available Sentinel-2 satellite images in the two study areas

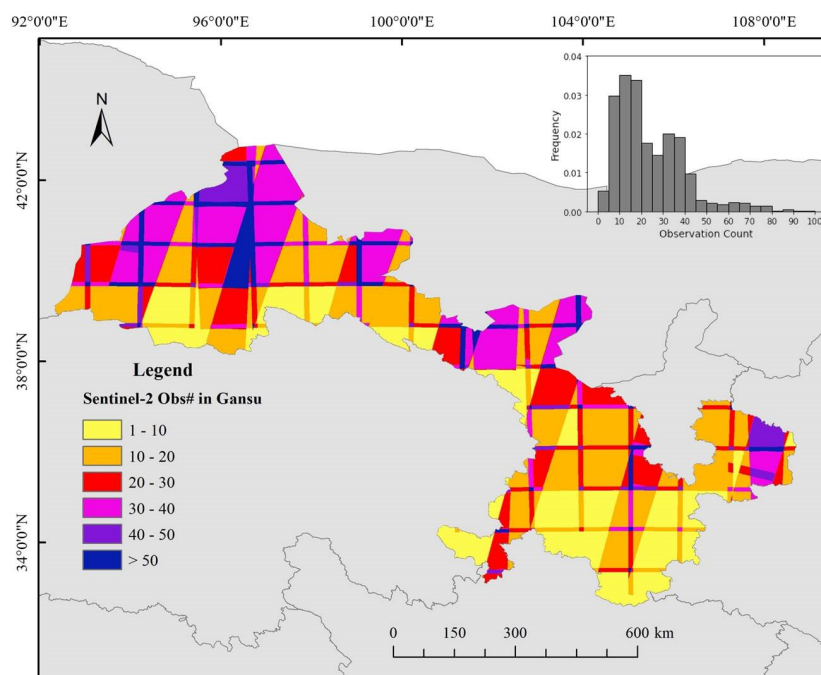

**Figure S1.** Number of Sentinel-2 observations (cloud < 10%, April 2021-Oct 2021) in Gansu.

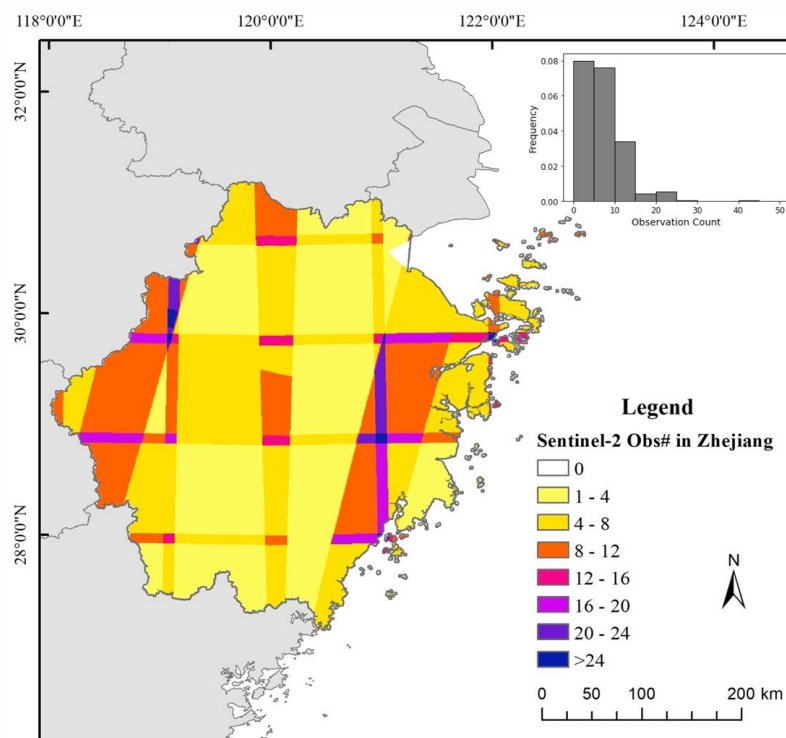

**Figure S2.** Number of Sentinel-2 observations (cloud < 10%, April 2021-Oct 2021) in Zhejiang.
